# Supplementary material
Source: publisher figshare collection journal article supplement (https://acs.figshare.com/ndownloader/files/4403803)
Supplement: Supplementary file 1 [file 4403803]

## Supporting Information

### Synthesis of well-defined silica and Pd/silica nanotubes through surface sol-gel process on self-assembled chelate block copolymer

Minchao Zhang, Wangqing Zhang\* and Shengnan Wang

Key Laboratory of Functional Polymer Materials of Ministry of Education, Institute of Polymer Chemistry, Nankai University, Tianjin 300071, China.

\*: To whom correspondence should be addressed. E-mail: [wqzhang@nankai.edu.cn](mailto:wqzhang@nankai.edu.cn).

Tel: 86-22-23509794, Fax: 86-22-23503510.

#### $^1\text{H}$ NMR analysis (Figure S1)

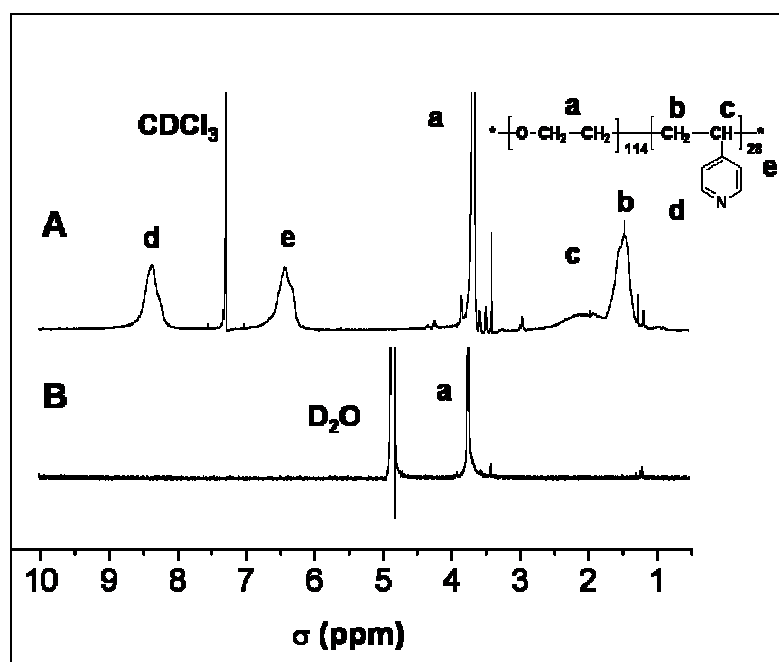

**Figure S1.**  $^1\text{H}$  NMR spectra of  $\text{PEG}_{114}\text{-}b\text{-P4VP}_{28}$  in  $\text{CDCl}_3$  and  $\text{D}_2\text{O}$ .

Figure S1A shows the  $^1\text{H}$  NMR spectra of the block copolymer  $\text{PEG}_{114}\text{-}b\text{-P4VP}_{28}$  in  $\text{CDCl}_3$  at room temperature. Clearly, all characteristic  $^1\text{H}$  NMR signals of the PEG

(peak *a* at  $\delta = 3.6$ ) and P4VP block (peaks *b* and *c* at  $\delta = 1.4-2.1$ , and *d* and *e* at  $\delta = 6.3-8.3$ ) can be clearly observed. This means that the block copolymer exists as single chains in  $\text{CDCl}_3$  since  $\text{CDCl}_3$  is a good solvent of the block copolymer. Compared with Figure S1A, the distinctness of the  $^1\text{H}$  NMR spectra shown in Figure S1B is that the peaks *b*, *c*, *d* and *e* corresponding to the P4VP block disappear. This suggests that the block copolymer  $\text{PEG}_{114}\text{-}b\text{-P4VP}_{28}$  self-assembles into core-corona micelles with the P4VP block as core and PEG block as corona in water at room temperature.<sup>1</sup>

### TEM observation (Figure S2)

Figure S2 shows the TEM image of the resultant irregular aggregates from the sol-gel polymerization when the  $\text{NH}_3$  aqueous solution was added into the micelles aqueous dispersion.

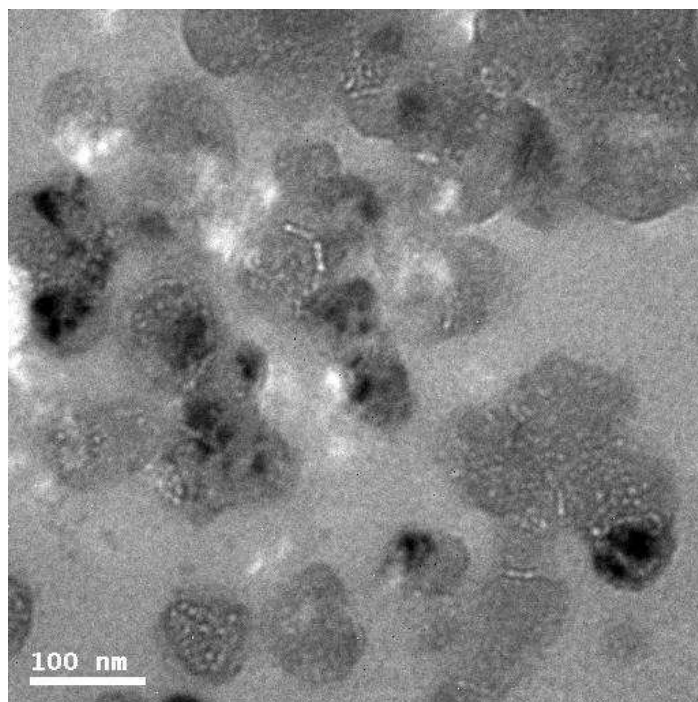

**Figure S2.** TEM image of the irregular aggregates.

### XRD analysis (Figure S3~S4)

Figure S3 shows the XRD pattern of the Pd/silica nanotubes following Method 1.

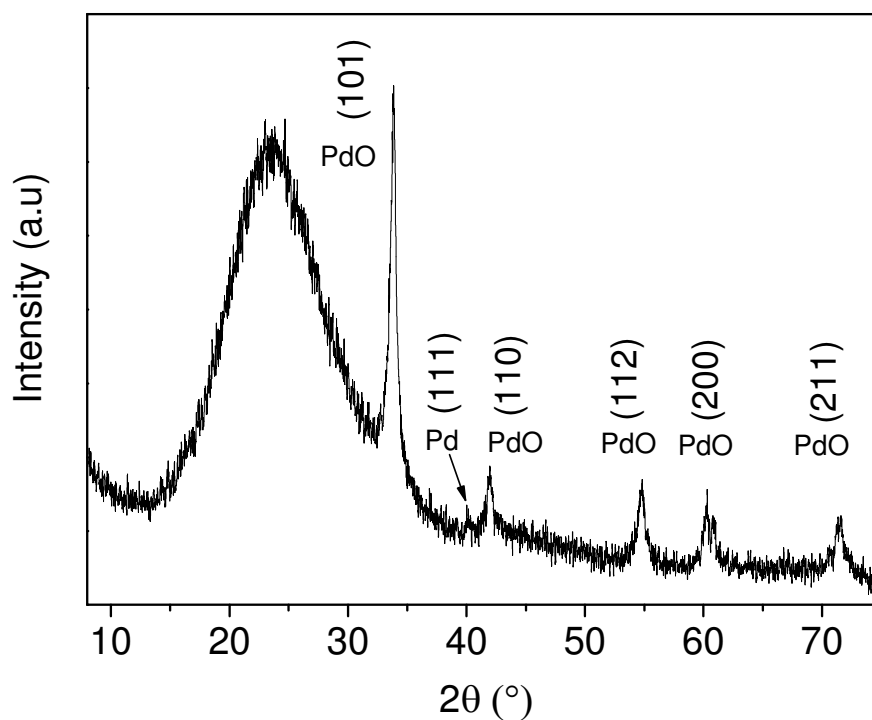

**Figure S3.** The XRD pattern of the silica-coated Pd/silica nanotubes following Method 1.

Figure S4 shows the XRD pattern of the silica and Pd/silica nanotubes following Method 2. From the (101) lattice plane, the size of PdO nanoparticles encapsulated within the cavum of the silica nanotubes is calculated to be 12.6 nm.

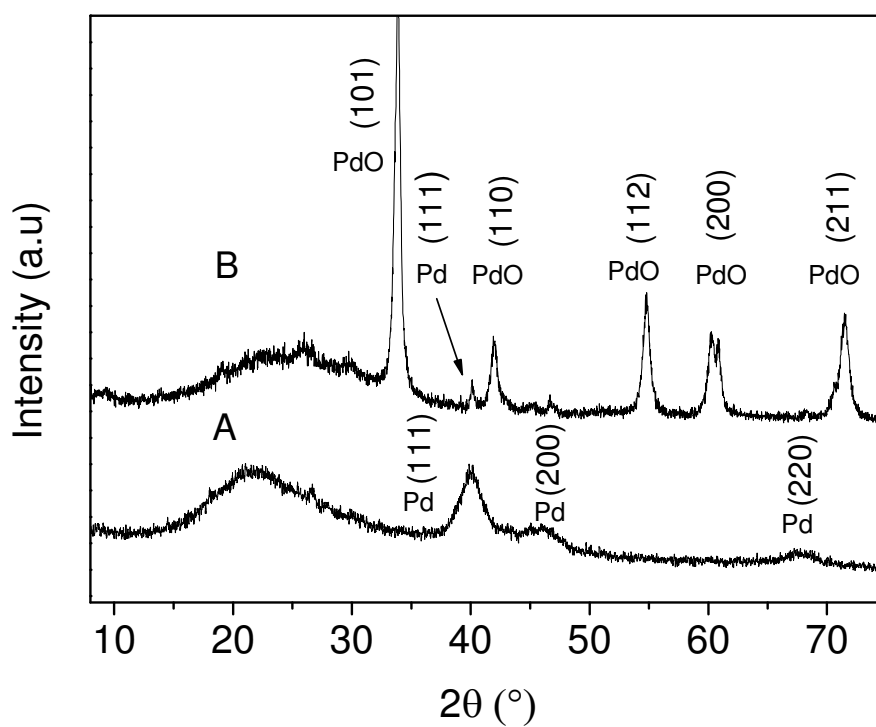

**Figure S4.** The XRD pattern of the Pd@micelles composite (A) and silica-coated Pd/silica nanotubes (B) following Method 2.

## References

1. (a) Zhang, W.; Jiang, X.; He, Z.; Xiong, D.; Zheng, P.; An, Y.; Shi, L. *Polymer* **2006**, *47*, 8203. (b) Yao, X.; Chen, D.; Jiang, M. *J. Phys. Chem. B.* **2004**, *108*, 5225.
